# Supplementary material for: Rapid and efficient removal of multiple aqueous pesticides by one-step construction boric acid modified biochar
Source: Royal Society of Chemistry journal article supplement (doi:10.1039/d2ra07684e), 2023-01-01
Supplement: d2ra07684e1.pdf [file d2ra07684e1.pdf]

## Supplementary Information

### Rapid and efficient removal of multiple aqueous pesticides by one-step construction boric acid modified biochar

Niannian Cao<sup>a,b</sup>, Jiawen Ji<sup>a</sup>, Changsheng Li<sup>a</sup>, Meng Yuan<sup>a</sup>, Xuanjun Guo<sup>a</sup>, Xingxing Zong<sup>b</sup>, Liqin Li<sup>b</sup>, Yongqiang Ma<sup>a</sup>, Chen Wang<sup>b,\*</sup>, Sen Pang<sup>a,\*</sup>

<sup>a</sup> *Department of Applied Chemistry, College of Science, China Agricultural University, Beijing, 100193, China*

<sup>b</sup> *State Key Laboratory of NBC Protection for Civilians, Beijing, 102205, China*

\*Corresponding author.

E-mail addresses: wangchenpla@163.com (C. Wang), [pangsen7812@cau.edu.cn](mailto:pangsen7812@cau.edu.cn) (S. Pang)

## 1. Adsorption capacity calculation equation

The equilibrium adsorption( $q_e$ ) was calculated as follows:

$$q_e = \frac{(C_0 - C_e) V}{m}$$

Where  $C_0$  (initial) and  $C_e$  (equilibrium) denote pesticide concentrations ( $\text{mg L}^{-1}$ ),  $V$  is the solution volume(L), and  $m$  is the mass of sorbent (g).

## 2. Kinetics model

The pseudo-first-order (Eq. (S1)), pseudo-second-order model (Eq. (S2)), Elovich model (Eq. (S3)), and Intra-particle diffusion model (Eq. (S4)) were used to describe the sorption kinetic data.

The equations of the four kinetic models are represented as follows:

Pseudo-first-order model:

$$\ln (q_e - q_t) = \ln q_e - K_1 t \quad (\text{S1})$$

Pseudo-second-order model:

$$\frac{t}{q_t} = \frac{1}{K_2 q_e^2} + \frac{t}{q_e}$$

(S2)

Elovich model:

$$q_t = \beta \ln (a\beta) + (\ln t) \quad (\text{S3})$$

Intra-particle diffusion model:

$$q_t = K_p \sqrt{t} + C \quad (\text{S4})$$

The symbols in the formula are explained as follows:

$q_t$  represents the adsorption capacity at time  $t$  (min), ( $\text{mg g}^{-1}$ );  $q_e$  represents the adsorption capacity at the equilibrium time ( $\text{mg g}^{-1}$ );  $t$  denotes the contact time (min);  $K_1$  denotes the pseudo-

first-order rate constant ( $\text{min}^{-1}$ );  $K_2$  denotes the pseudo-second-order rate constant ( $\text{g mg}^{-1} \text{min}^{-1}$ ).  $\alpha$  is the sorption kinetic at the beginning ( $\text{mg g}^{-1} \text{min}^{-1}$ ) and  $\beta$  is the sorption constant related to the extent of surface coverage and the activation energy for chemisorption during the experiments ( $\text{g mg}^{-1}$ ). The constants  $\alpha$  and  $\beta$  can be obtained from the slope and intercept of the linear plot of  $q_t$  Vs  $\ln t$ .

$K_p$  denotes the intra-particle diffusion rate constant ( $\text{mg g}^{-1} \text{min}^{0.5}$ );  $C$  denotes the constant about the thickness of the boundary layer.

### 3. Isotherms models

Langmuir (Eq. (S5)), Freundlich (Eq. (S6)), and Temkin models (Eq. (S7)) were applied to determine the sorption characteristics. The three isotherm equations are provided as follows:

Langmuir model:

$$\frac{1}{q_e} = \frac{1}{k_L q_m C_e} + \frac{1}{q_m} \quad (\text{S5})$$

Freundlich model:

$$\ln q_e = \ln k_F + \frac{1}{n} \ln C_e \quad (\text{S6})$$

Temkin model:

$$q_e = B \ln C_e + B \ln K_T \quad (\text{S7})$$

The symbols in the formula are explained as follows:

$q_e$  denotes the adsorption capacity at the equilibrium time ( $\text{mg g}^{-1}$ );  $q_m$  denotes the maximum adsorption capacity ( $\text{mg g}^{-1}$ ).  $K_L$  denotes the Langmuir constant ( $\text{L mg}^{-1}$ );  $C_e$  denotes the equilibrium concentration of pesticides after adsorption ( $\text{mg L}^{-1}$ );  $K_F$  denotes the Freundlich

constant ( $L\ mg^{-1}$ ). B is a constant related to the heat of sorption and it is defined by the expression  $B = RT/b$ , b is the Temkin constant ( $J\ mol^{-1}$ ), T is the absolute temperature (K), R is the gas constant ( $8.314\ J\ mol^{-1}\ K$ ), and A is the Temkin isotherm constant ( $L\ g^{-1}$ ). From the plot of  $q_e$  Vs  $\ln C_e$ , B and A can be calculated from the slopes (B) and intercepts ( $B \ln A$ ) respectively.

Table S1. Multiple reaction monitoring (MRM) data acquisition parameters of HPLC-MS/MS for the four pesticides.

| Pesticides    | precursor ion (m/z) | product ion | Fragmentor (V) | Collision Energy (V) |
|---------------|---------------------|-------------|----------------|----------------------|
| Tricyclazole  | 190                 | 135.9*      | 130            | 28                   |
|               |                     | 163         |                | 20                   |
| Propiconazole | 342.0               | 159*        | 90             | 30                   |
|               |                     | 69          |                | 20                   |
| Imidacloprid  | 256                 | 209.1*      | 73             | 10                   |
|               |                     | 175.1       |                | 15                   |
| Thiamethoxam  | 292                 | 211*        | 85             | 5                    |
|               |                     | 132.1       |                | 20                   |

\*Quantitative ion

Table S2. Elemental composition of different biochars

| Sample | C, wt% | H, wt% | O, wt% | B, wt% | N, wt% | H/C    | O/C    | (N+O)/C |
|--------|--------|--------|--------|--------|--------|--------|--------|---------|
| WA     | 82.88  | 1.924  | 10.908 | 0.0854 | 0.69   | 0.0232 | 0.1316 | 0.0315  |
| WAB0.5 | 74.18  | 2.627  | 18.797 | 0.045  | 0.85   | 0.0354 | 0.2534 | 0.0469  |
| WAB1   | 71.47  | 2.467  | 21.719 | 0.1017 | 1.06   | 0.0345 | 0.3039 | 0.0493  |
| WAB2   | 69.23  | 2.478  | 26.083 | 0.228  | 1.15   | 0.0358 | 0.3768 | 0.0524  |
| WAB4   | 69.78  | 2.489  | 26.591 | 0.199  | 1.21   | 0.0357 | 0.3811 | 0.0530  |

Table S3. The XPS results of WA (pristine biochar) and WAB4 on C and O atomic percentages and distributions.

| Sample | C (%) | O (%) | C/O  | C1s (%) |       |       | O1s (%) |       |                    |
|--------|-------|-------|------|---------|-------|-------|---------|-------|--------------------|
|        |       |       |      | C=C     | C-O   | O-C=O | C=O     | -OH   | CO/CO <sub>2</sub> |
| WA     | 87.63 | 10.91 | 8.03 | 72.39   | 18.97 | 8.64  | 49.99   | 50.01 | -                  |

Table S4. Key physicochemical properties of investigated pesticides.

| pesticides    | Water Solubility<br>(mg L <sup>-1</sup> ) 20°C | Lipophilicity<br>(log P) | Soil Affinity<br>(log K <sub>oc</sub> ) | pK <sub>a</sub> | H-bonding acceptor<br>parameter | H-bonding donor<br>parameter |
|---------------|------------------------------------------------|--------------------------|-----------------------------------------|-----------------|---------------------------------|------------------------------|
| Tricyclazole  | 596                                            | 1.4                      | 169                                     | ND <sup>a</sup> | 3                               | 0                            |
| Imidacloprid  | 610                                            | 0.57                     | -                                       | ND              | 4                               | 1                            |
| Thiamethoxam  | 4100                                           | -0.13                    | 56.2                                    | ND              | 6                               | 0                            |
| Propiconazole | 150                                            | 3.72                     | 1086                                    | 1.09            | 3                               | 1                            |

<sup>a</sup> No dissociation.

Table S5. Thermodynamic parameters of four pesticides adsorption on WAB4

| Pesticides    | T   | K <sub>0</sub> | ΔG<br>(KJ mol <sup>-1</sup> ) | ΔH<br>(KJ mol <sup>-1</sup> ) | ΔS<br>(J mol <sup>-1</sup> K <sup>-1</sup> ) |
|---------------|-----|----------------|-------------------------------|-------------------------------|----------------------------------------------|
| Tricyclazole  | 298 | 6.33           | -4.572                        | 9.0879                        | 45.7270                                      |
|               | 308 | 6.83           | -4.920                        |                               |                                              |
|               | 318 | 7.98           | -5.491                        |                               |                                              |
| Propiconazole | 298 | 6.46           | -4.622                        | 0.8495                        | 18.2908                                      |
|               | 308 | 6.57           | -4.821                        |                               |                                              |
|               | 318 | 6.6            | -4.989                        |                               |                                              |
| Imidacloprid  | 298 | 5.80           | -4.355                        | 0.4009                        | 15.9454                                      |
|               | 308 | 5.80           | -4.501                        |                               |                                              |
|               | 318 | 5.86           | -4.647                        |                               |                                              |
| Thiamethoxam  | 298 | 5.36           | -4.514                        | -6.0337                       | -6.2560                                      |
|               | 308 | 5.01           | -4.129                        |                               |                                              |
|               | 318 | 4.60           | -4.033                        |                               |                                              |

Table S6 Physical and chemical properties of real water samples

| Physico-chemical indicators   | Deionized water | Tap water | Paddy water | River water |
|-------------------------------|-----------------|-----------|-------------|-------------|
| pH                            | 7.06            | 7.07      | 7.04        | 8.2         |
| Hardness                      | 4               | 202.18    | 154.13      | 126.11      |
| Alkalinity                    | 8.5             | 166       | 126         | 138         |
| CO <sub>3</sub> <sup>2-</sup> | 0               | 0         | 0           | 4.5         |
| HCO <sub>3</sub> <sup>-</sup> | 2.745           | 21.655    | 17.995      | 5.49        |
| Ca <sup>2+</sup>              | 0.5418          | 47.490    | 39.890      | 18.736      |
| K <sup>+</sup>                | 0.0159          | 1.6918    | 1.7671      | 13.675      |
| Mg <sup>2+</sup>              | 0.1842          | 21.316    | 13.559      | 13.219      |
| Na <sup>+</sup>               | 0.6355          | 18.794    | 15.209      | 87.203      |
| Cl <sup>-</sup>               | 8.5118          | 13.0414   | 15.8832     | 60.4238     |

|                               |         |         |         |         |
|-------------------------------|---------|---------|---------|---------|
| NO <sub>3</sub> <sup>-</sup>  | 39.8307 | 57.0348 | 46.0599 | 58.1675 |
| SO <sub>4</sub> <sup>2-</sup> | 7.9565  | 28.9050 | 15.4988 | 49.9895 |

Table S7. *Daphnia magna* immobilization and mortality for different concentrations of WAB4

| Concentration of WAB4 (mg L <sup>-1</sup> ) | Immobilization |      | Mortality |      |
|---------------------------------------------|----------------|------|-----------|------|
|                                             | 24 h           | 48 h | 24 h      | 48 h |
| 0                                           | 0              | 0    | 0         | 0    |
| 1                                           | 0              | 0    | 0         | 0    |
| 10                                          | 0              | 0    | 0         | 0    |
| 50                                          | 0              | 0    | 0         | 0    |
| 100                                         | 0              | 0    | 0         | 0    |
| 200                                         | 0              | 0    | 0         | 0    |

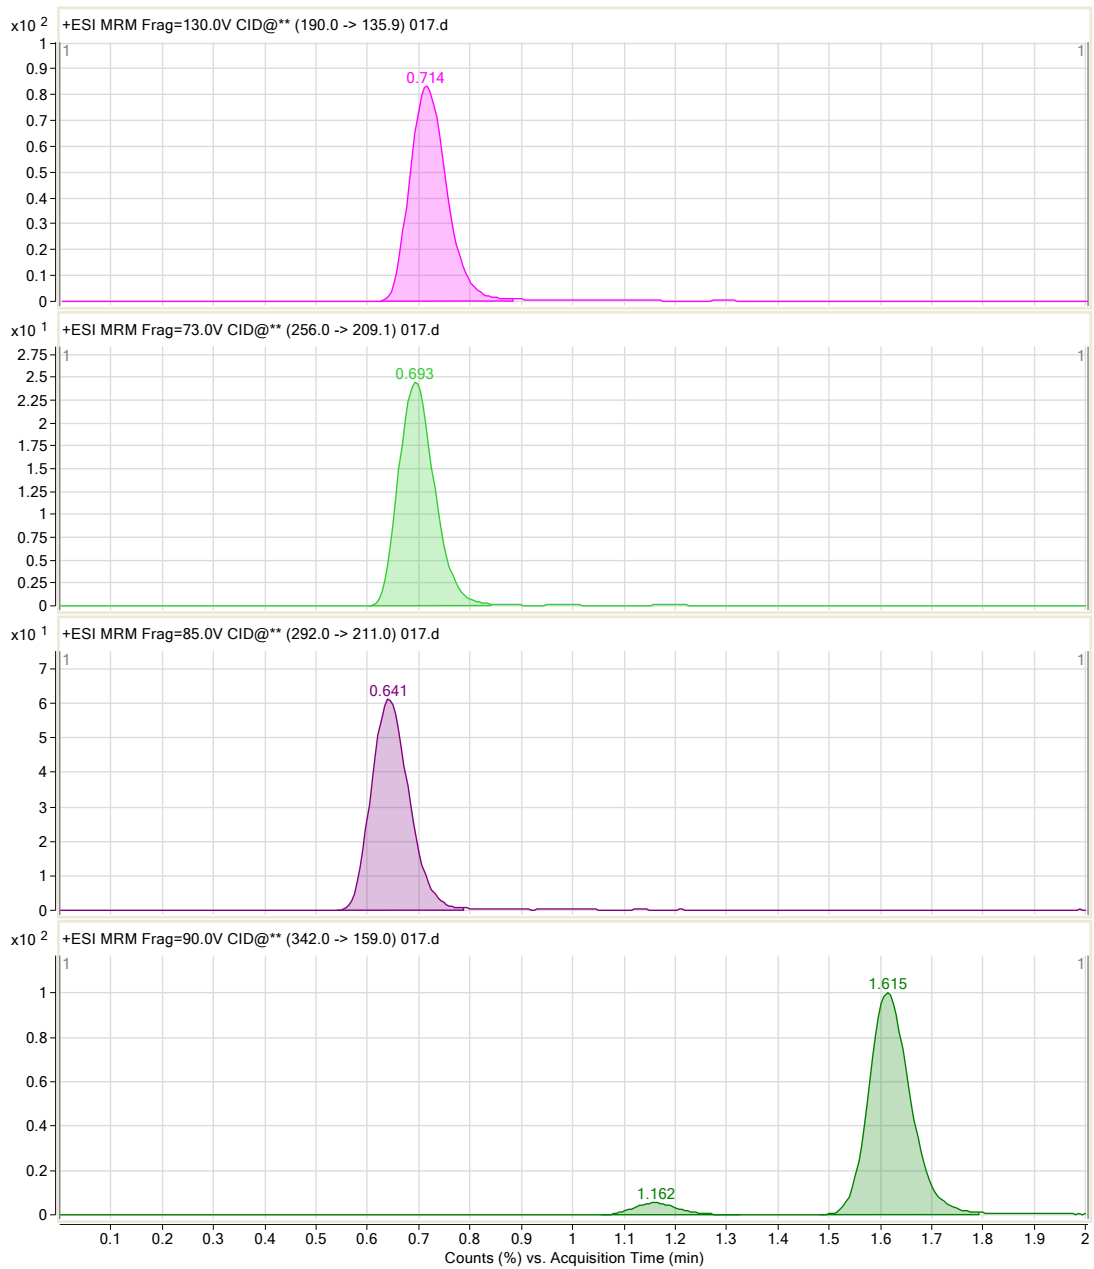

Fig. S1. LC-MS/MS spectrograms of five pesticides

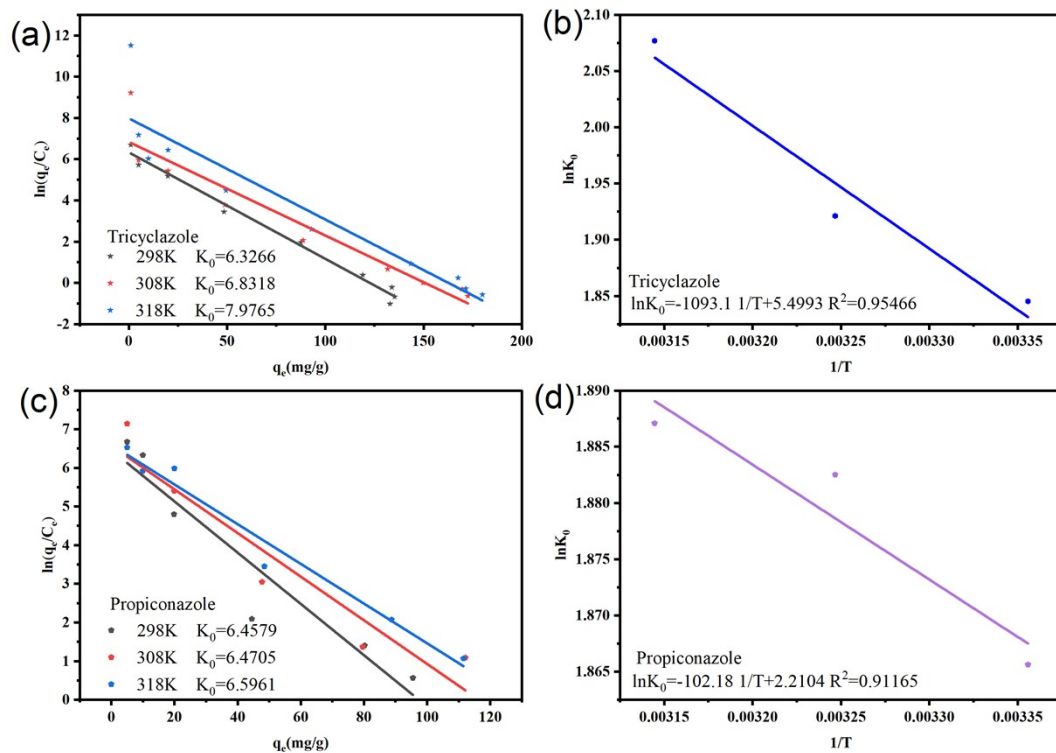

Fig. S2. (a), (b) van't Hoff plots of tricyclazole adsorption onto WAB4; (c), (d) van't Hoff plots of propiconazole adsorption onto WAB4

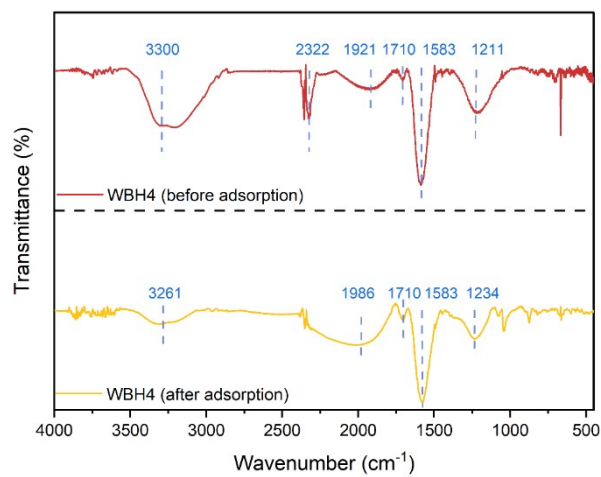

Fig. S3. FTIR spectrum of WAB4 before and after adsorption of four pesticides



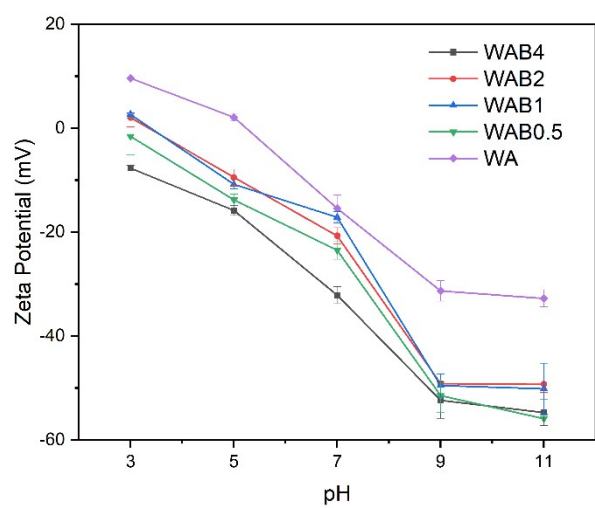

Fig. S4. The Zeta potential of all materials at varying solution pH from 3 to 11 (adsorbent dosage=1 g L<sup>-1</sup>).
